# Supplementary material for: Vitamin D Supplementation and Hemoglobin Levels in Hypertensive Patients: A Randomized Controlled Trial
Source: Hindawi journal article supplement (doi:10.1155/2016/6836402), 2016-01-01
Supplement: f1 [file 6836402.f1.pdf]

## Supplemental Material

**Table S1:** Effect of vitamin D treatment on hematological parameters in anemic hypertensive subjects

| Characteristics                    | Vitamin D group (n=7) |                     |                           | Placebo group (n=4) |                     |                           | Treatment Effect      | P-value |
|------------------------------------|-----------------------|---------------------|---------------------------|---------------------|---------------------|---------------------------|-----------------------|---------|
|                                    | Baseline              | Follow-Up (8 weeks) | Mean Change from Baseline | Baseline            | Follow-Up (8 weeks) | Mean Change from Baseline |                       |         |
| Hematological Parameters           |                       |                     |                           |                     |                     |                           |                       |         |
| Hemoglobin (g/dL)                  | 11.8±0.7              | 11.8±0.9            | -0.01 (-0.64 to 0.61)     | 10.8±1.3            | 10.9±1.0            | 0.15 (-1.74 to 2.04)      | 0.29 (-1.10 to 1.67)  | 0.643   |
| Hematokrit (%)                     | 34.5±3.0              | 34.3±3.3            | -0.10 (-1.59 to 1.34)     | 31.6±3.2            | 32.4±2.0            | 0.83 (-3.46 to 5.11)      | -0.15 (-3.35 to 3.06) | 0.919   |
| Erythrocytes (10 <sup>12</sup> /L) | 3.89±0.6              | 3.91±0.7            | 0.01 (-0.19 to 0.21)      | 4.02±0.3            | 4.04±0.3            | 0.23 (-0.46 to 0.51)      | 0.00 (-0.38 to 0.38)  | 0.985   |
| MCV (μm <sup>3</sup> )             | 89.6±9.0              | 89.7±11.9           | 0.13 (-2.85 to 3.10)      | 78.5±5.0            | 80.3±3.9            | 1.75 (-1.75 to 5.20)      | -4.14 (-8.50 to 0.23) | 0.060   |
| MCH (pg Hb/RBC)                    | 28.8±1.2              | 28.5±1.3            | -0.30 (-0.77 to 0.17)     | 26.8±2.4            | 27.0±2.1            | 0.28 (-1.35 to 1.90)      | -0.28 (-1.93 to 1.37) | 0.677   |
| MCHC (g/L)                         | 34.3±1.5              | 34.4±1.2            | 0.06 (-0.54 to 0.65)      | 34.0±1.5            | 33.6±1.3            | -0.42 (-3.33 to 2.50)     | 0.62 (-0.81 to 2.06)  | 0.345   |

**Table S2:** Effect of vitamin D treatment on hematological parameters in hypertensive subjects with initial 25-hydroxyvitamin D levels <30 nmol/l

| Characteristics                    | Vitamin D group (n=6) |                     |                           | Placebo group (n=8) |                     |                           | Treatment Effect      | P-value |
|------------------------------------|-----------------------|---------------------|---------------------------|---------------------|---------------------|---------------------------|-----------------------|---------|
|                                    | Baseline              | Follow-Up (8 weeks) | Mean Change from Baseline | Baseline            | Follow-Up (8 weeks) | Mean Change from Baseline |                       |         |
| Hematological Parameters           |                       |                     |                           |                     |                     |                           |                       |         |
| Hemoglobin (g/dL)                  | 14.7±1.3              | 14.4±1.1            | -0.28 (-0.82 to 0.26)     | 15.0±1.2            | 14.5±1.3            | -0.46 (-0.80 to 0.11)     | 0.16 (-0.39 to 0.71)  | 0.543   |
| Hematokrit (%)                     | 41.7±3.4              | 40.6±2.7            | -1.15 (-2.55 to 0.25)     | 43.3±2.9            | 41.7±3.1            | -1.52 (-2.67 to 0.37)     | 0.15 (-1.49 to 1.80)  | 0.841   |
| Erythrocytes (10 <sup>12</sup> /L) | 4.76±0.3              | 4.63±0.2            | -0.12 (-0.23 to 0.02)     | 5.04±0.5            | 4.84±0.4            | -0.19 (-0.30 to 0.07)     | -0.02 (-0.12 to 0.16) | 0.750   |
| MCV (μm <sup>3</sup> )             | 87.6±4.4              | 87.4±4.2            | -0.11 (-1.42 to 1.19)     | 86.0±4.8            | 86.1±4.8            | 0.11 (-2.02 to 2.25)      | -0.05 (-2.62 to 2.53) | 0.969   |
| MCH (pg Hb/RBC)                    | 30.9±2.2              | 31.0±2.2            | 0.18 (-0.56 to 0.92)      | 29.2±1.7            | 29.2±1.9            | 0.08 (-0.26 to 0.42)      | 0.06 (-0.70 to 0.81)  | 0.869   |
| MCHC (g/L)                         | 35.1±0.9              | 35.4±0.6            | 0.28 (-0.31 to 0.88)      | 34.4±1.2            | 34.66±1.1           | 0.14 (-0.77 to 1.04)      | 0.48 (-0.49 to 1.46)  | 0.299   |
